# Supplementary material
Source: publisher figshare collection journal article supplement (https://frontiersin.figshare.com/ndownloader/files/20273526)
Supplement: Supplementary file [file 20273526]

# Supplementary Material

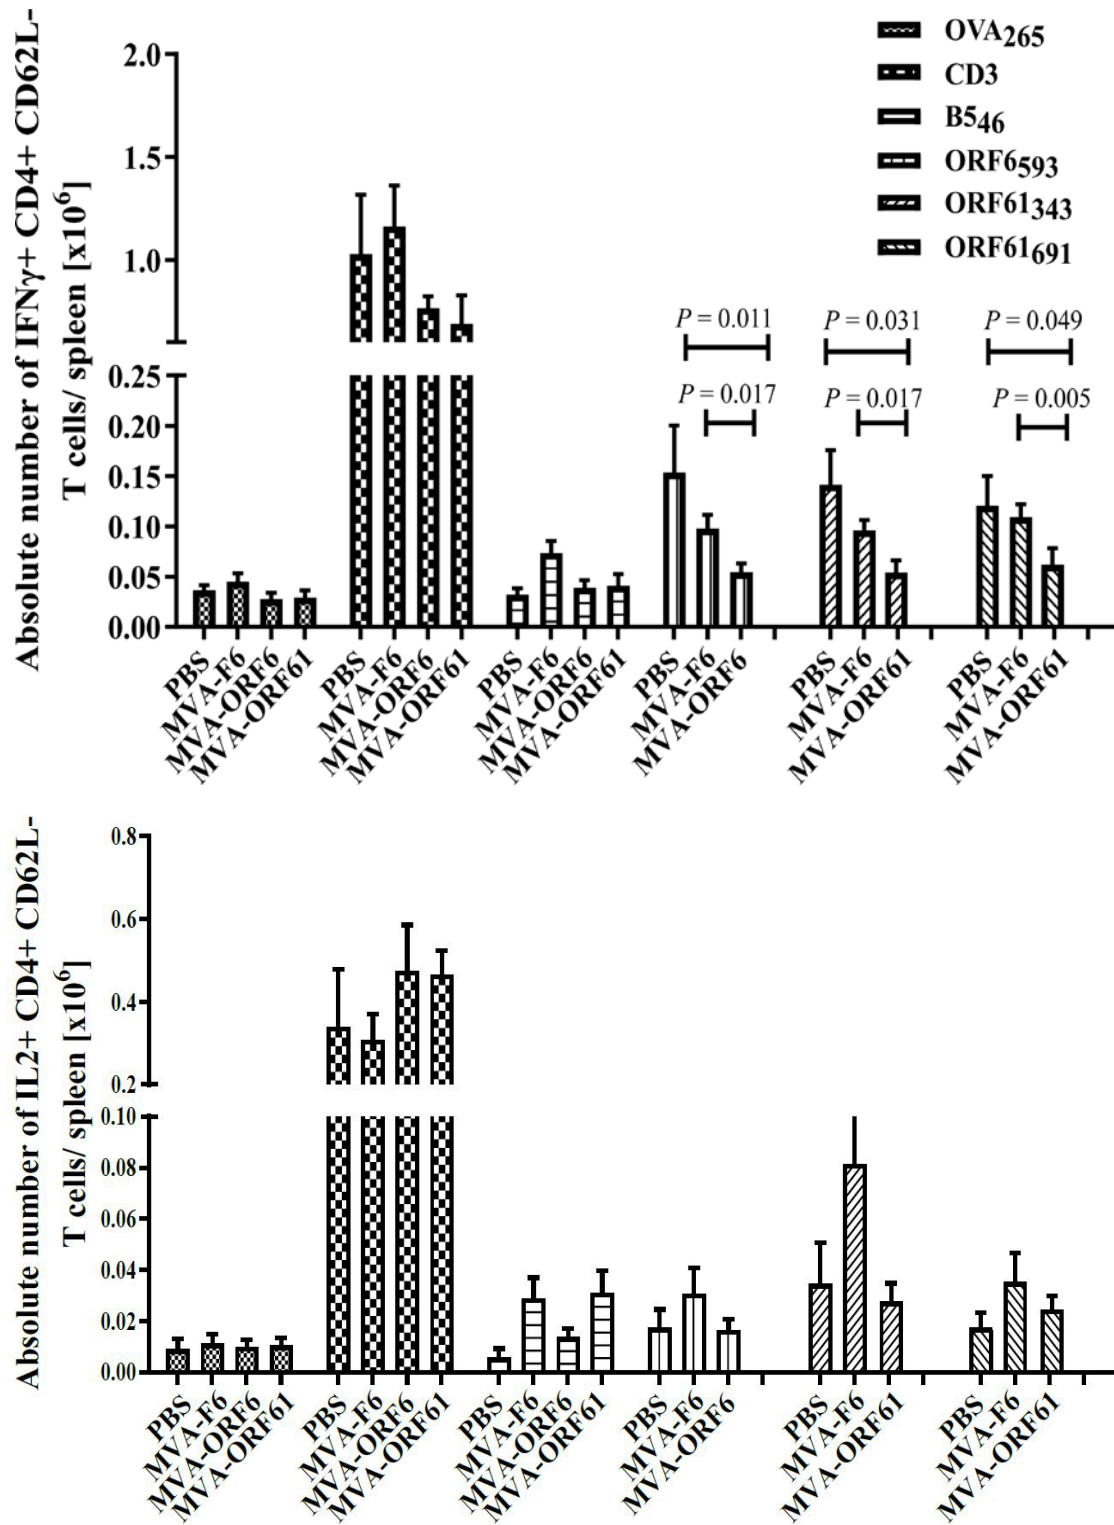

**Supplementary Figure 3.** *Ex vivo* CD4<sup>+</sup> T cell responses after recMVA vaccination followed by MHV-68 challenge (**absolute numbers**). Mice were i.p. prime/boost vaccinated (boost at day 5 post prime) with MVA-F6, MVA-ORF6 or MVA-ORF61 using  $1 \times 10^8$  IU/200 $\mu$ l or PBS. Four weeks later, mice were challenged i.n. with MHV-68 ( $5 \times 10^4$  PFU/20 $\mu$ l). At day 17 after challenge, splenocytes were subjected to ICS followed by FACS analysis. Absolute numbers of activated (CD62L<sup>-</sup>) IFN $\gamma$ - (upper panel) or IL2-producing ORF6- and ORF61-specific CD4<sup>+</sup> T cells (lower panel). Splenocytes were stimulated with peptide epitopes ORF6<sub>593</sub>, ORF61<sub>343</sub>, ORF61<sub>691</sub>, OVA<sub>265</sub> (negative control) or B5<sub>46</sub> (vaccination control). CD3 indicates non-antigen-specific T cell stimulation using anti-CD3 antibodies. Data shown are mean  $\pm$  SEM of n=11 mice per group, pooled from 3 independent experiments.
